# Supplementary material
Source: publisher site journal article supplement (https://www.spandidos-publications.com/6218/downloadSupplementary)
Supplement: Supplementary file 1 [file downloadSupplementary]

## Sheet: Table SI
Table SI. List of log2FoldChange in 498 differentially expressed genes.
Gene_name	A2780_Taxol	FDR(A2780-Taxol)	A.16PTX	A.16PTX-padj	A.32PTX	A.32PTX-padj	A.64PTX	A.64PTX-padj	A.128PTX	A.128PTX-padj
ARID5B	4.1416	4.5e-303	-3.19024	0.00605268	-5.35278	0.000145532	-8.79841	1.38e-05	-5.14053	0.00102765
ARL17A	-2.48231	0	-5.61871	1.59e-50	-6.42559	6.09e-59	-6.31014	9.21e-47	-6.01905	1.26e-28
ARMC10	1.1693	2.38e-37	1.57198	0.000113654	2.1367	3.17e-07	1.97983	3.71e-06	2.39581	6.85e-05
ARSD	-1.34186	5.89e-123	4.87277	1.78e-08	4.99254	4.36e-09	5.13235	4.05e-09	5.40925	3.24e-09
ASNS	2.77968	0	2.81747	5.85e-17	3.73792	2.16e-31	3.37137	2.47e-19	3.64271	7.85e-11
ASS1	7.38232	0	4.67094	1.31e-13	6.61752	5.69e-29	6.85306	8.22e-23	6.38092	8.16e-18
ATF3	4.5398	2.91e-99	4.94745	1.28e-19	4.14905	5.21e-12	4.42786	1.54e-10	5.31955	8.17e-16
ATP11B	-7.01833	0	3.05162	5.41e-18	2.29801	1.24e-08	2.50803	5.14e-11	3.84242	2.17e-11
HS6ST2	-5.58496	1.97e-08	6.50129	8.64e-43	5.24049	1.67e-26	5.23951	3.7e-24	5.61558	1.55e-20
SIK1	-7.25739	1.44e-29	2.27342	9.35e-06	2.45771	1.32e-07	2.20926	3.01e-05	2.47555	8.87e-05
AARD	-10.236	2.33e-106	2.96876	8e-17	3.81786	2.99e-31	3.87112	6.51e-24	3.62279	1.52e-11
ABCA5	-4.49881	5.77e-151	-1.73344	0.000265165	-2.18193	9.35e-06	-1.8926	0.000259231	-2.69014	3.52e-05
ABCB1	9.6975	0	3.57128	7.57e-08	3.67055	1.46e-08	4.55068	7.98e-14	5.5149	2.26e-17
ACAT2	-2.14896	0	-2.82379	4.22e-16	-3.24564	5.04e-21	-2.92903	1.06e-12	-2.66484	6.75e-07
ACOT2	-2.75165	3.27e-160	-1.7718	2.54e-05	-1.38465	0.000617838	-1.23805	0.00750885	-1.62153	0.00982938
ACSL1	-3.90553	0	-1.81898	5.53e-07	-2.51526	4.33e-14	-2.76561	1.39e-12	-1.78671	0.00141143
ACTR6	1.02042	2.75e-16	1.80655	4.53e-05	2.47274	2.05e-10	2.17174	2.21e-06	2.27991	0.000598152
ADAM19	1.91511	1.78e-30	4.08802	4.29e-26	2.49426	4.32e-08	2.69352	1.74e-07	3.2376	4.76e-08
ADAMTS1	-11.3987	0	-2.39996	1.97e-07	-1.83614	1.32e-06	-1.29144	0.00252838	-4.6099	2.25e-14
ADGRB1	-6.08321	3.03e-53	2.12915	4.4e-06	1.73857	5.94e-05	2.63784	9.56e-09	2.02436	0.00104185
ADGRG6	2.13228	6.12e-137	4.11211	1.39e-26	3.12297	3.4e-19	3.10011	1.55e-14	3.59503	4.64e-10
ADGRL2	-11.7249	0	-4.28529	2.47e-31	-7.10153	1.43e-60	-9.68857	9.76e-43	-7.48231	1.36e-35
ADM	1.67894	1.13e-15	4.75095	0.00145365	6.03894	1.69e-49	4.75614	3.22e-24	3.10948	3.32e-06
ADM2	3.69647	3.11e-43	3.76672	7.21e-08	4.76981	1.29e-15	5.17454	5.25e-13	5.29856	1.42e-14
AGFG2	-2.21471	0	-2.47127	6.69e-11	-3.5419	7.49e-22	-2.18372	1.56e-07	-1.75529	0.00426437
AHI1	-2.74137	1.28e-181	-2.38488	3.7e-08	-3.03111	2.22e-13	-2.95874	1.98e-10	-2.11689	0.000507061
AJUBA	1.61659	6.46e-64	1.54665	0.00168934	1.38775	0.000308648	1.24941	0.00996881	1.94123	0.000758711
AKAP12	-2.51197	0	-1.89408	7.57e-07	-3.17372	4.49e-16	-2.5095	2.04e-08	-1.98384	0.00227459
AKNA	3.35279	1.96e-50	3.9168	1.14e-11	4.90775	1.52e-16	4.81714	3.03e-11	6.15851	5.24e-23
AKR1B1	-6.70214	0	-2.48114	5.55e-14	-1.9513	2.25e-09	-1.92215	1.22e-05	-2.60808	7.49e-07
AKT1S1	-1.05317	1.6e-133	-2.26164	1.98e-08	-1.78804	2.21e-07	-1.40119	0.000593912	-2.02491	0.000272693
AKT3	-8.15735	8.82e-130	-2.31633	6.89e-05	-5.78224	1.14e-16	-6.02613	4.98e-16	-2.90853	0.000133418
ALDH1L2	-7.15987	1.23e-124	3.51678	1.55e-24	2.14127	2.08e-08	1.90053	8.43e-05	3.89998	6.8e-13
ALG10	-2.09443	9.88e-64	-1.51311	0.00125778	-2.72772	1.84e-07	-2.61539	1.16e-06	-2.09692	0.00759685
ALPK1	3.4361	2.14e-26	3.08613	0.000536485	3.98678	4.07e-07	3.70198	7.65e-05	4.76124	6.79e-10
ALS2	-1.65072	2.27e-274	-1.24462	0.0046651	-1.95384	2.43e-08	-2.32275	2.06e-08	-1.61455	0.00519642
ANK2	-11.6041	0	-2.7162	1.14e-13	-2.86997	1.49e-14	-3.36922	9.24e-14	-1.87921	0.000873183
ANK3	1.3775	7.83e-108	-5.01772	1.39e-21	-7.94904	6.08e-27	-8.52477	1.65e-23	-5.42739	4.31e-11
ANKLE1	-4.52669	2.87e-126	-4.2658	3.32e-15	-3.96942	3.12e-13	-3.72542	2.89e-09	-3.84917	1.91e-08
ANKRA2	1.01106	9.35e-07	1.75488	0.00453271	2.23996	2.12e-05	2.22104	0.000114496	2.26603	0.00170194
ANKRD1	6.78136	1.56e-07	16.386	1.05e-10	16.2023	1.09e-13	16.0955	2.15e-13	15.6764	3.4e-12
ANTXR1	-11.2396	0	-2.44355	2.34e-09	-3.04409	4.07e-15	-3.21416	9.55e-14	-2.44729	3.55e-05
ANXA9	-1.73628	4.73e-47	-3.83607	1.55e-12	-3.66263	3.88e-12	-3.07165	4.94e-08	-2.96792	3.29e-05
ARG2	-2.54289	1.6e-229	-2.88539	2.74e-13	-2.23661	1.86e-08	-2.51117	5.05e-08	-1.88396	0.00240074
ARHGAP28	9.0954	4.27e-105	9.14124	0.000139	8.23538	0.000777	8.33152	0.000828	8.73252	0.000626
ARHGAP4	-5.30639	1.92e-216	-5.72792	2.28e-26	-4.44469	1.23e-19	-3.97	2.71e-13	-5.05233	3.56e-15
ARHGEF17	-1.63042	1.17e-183	-1.59924	2.78e-05	-2.32161	1.62e-10	-2.45619	1.07e-08	-2.16018	0.000428826
ARID3A	-4.20224	0	-1.88083	1.65e-06	-3.17624	4.28e-17	-3.05458	6.8e-13	-2.35196	0.000190316
ARMCX2	-12.7256	0	-2.01276	1.38e-06	-2.03214	1.67e-08	-2.86784	4.4e-12	-2.40471	9.99e-05
ARMCX4	-8.73471	2.01e-139	-3.12748	6.89e-09	-2.84986	1.05e-07	-2.01893	0.000494251	-2.74323	7.53e-05
BAHCC1	-1.73002	1.14e-212	-2.5479	1.62e-09	-3.5631	1.75e-22	-2.99391	3.88e-12	-2.45577	0.000119048
BCAS3	-2.63227	0	-2.50379	6.41e-12	-1.33843	0.000613839	-1.61361	9.38e-05	-1.82805	0.00181637
BCAT1	-9.01959	0	2.70619	3.23e-16	1.93204	1.92e-06	1.68303	2.29e-05	2.57448	9.92e-07
BCL2	1.8501	0.000512	4.64827	8.11e-20	4.05685	3.34e-13	3.71278	3.72e-09	4.8483	2.3e-14
BCL6	-3.36325	0	-2.97255	1.7e-08	-3.19012	3.04e-15	-3.49229	3.75e-14	-2.98395	1.26e-07
BET1	2.01898	4e-25	2.48446	4.97e-06	3.57777	4.71e-14	3.32343	1.26e-10	3.38009	2.66e-06
BICC1	-7.8893	0	-7.48626	1.88e-47	-7.33293	2.51e-49	-10.2492	0.000521	-6.69194	5.72e-29
BRWD3	-3.01587	0	-1.10652	0.00340379	-3.22279	5.17e-20	-3.14716	9.01e-15	-2.01084	0.0011001
C15orf40	-1.40164	2.74e-74	-2.71748	2.22e-11	-1.72707	1.67e-05	-1.69982	0.000652855	-2.23619	0.000203475
C19orf54	-1.39193	7.63e-59	-2.48929	3.43e-09	-2.44412	7.67e-08	-2.10111	0.000166943	-1.70508	0.00682955
CAPN15	-1.08079	1.44e-96	-1.78861	0.000364722	-1.69827	3.55e-06	-1.41262	0.000961276	-1.87682	0.00330803
CAPZA2	1.27153	1.84e-124	1.89538	6.84e-08	2.13052	1.87e-10	1.67964	3.04e-05	1.9759	0.00113848
CASKIN2	-1.18249	7.71e-39	-1.83174	0.00177699	-2.91017	4.98e-10	-2.59597	2.86e-07	-2.12127	0.00259521
CASP4	12.9746	0	9.96235	1.96e-05	9.88985	1.54e-05	9.68712	3.23e-05	10.5391	1.08e-05
CBWD6	-1.02613	5.32e-22	-3.7277	1.59e-12	-1.92945	8.76e-05	-2.43474	1.14e-05	-3.05396	6.3e-05
CBX2	-2.53839	6.61e-196	-1.30191	0.0062326	-1.11495	0.00402859	-1.39772	0.00177066	-1.76014	0.00375044
CCDC74A	-2.51702	3.93e-65	-3.01451	5.67e-07	-1.87627	0.000291839	-1.69151	0.00253607	-2.37702	0.000794824
CCDC77	2.66297	1.79e-72	2.47143	4.24e-07	2.30267	6.85e-06	2.16523	0.000402349	2.37407	0.000499048
CCDC86	-1.02452	1.54e-113	-2.28944	4.61e-09	-2.21501	9.09e-10	-2.15956	1.15e-07	-2.29785	3.49e-05
CCZ1B	1.26178	9.98e-51	-2.59688	3.75e-06	-2.6967	2.38e-06	-2.65949	3.19e-05	-1.93685	0.00985826
CD248	-10.716	0	-1.76764	2.49e-05	-1.86073	8.35e-05	-1.58667	0.00024454	-3.65915	5.39e-11
CD4	-1.68012	4.43e-11	-2.72135	0.0039332	-3.28768	0.00115	-3.78195	0.000436	-2.84511	0.00895901
CD9	1.6453	0	-3.67099	6.44e-19	-2.48352	7.71e-10	-1.95263	1.33e-05	-2.6497	4.61e-06
CDC42EP4	-1.32869	2.72e-138	-3.05631	4.81e-14	-2.95637	1.5e-14	-3.0007	5.2e-13	-2.75664	2.23e-06
CDK1	4.12489	0	2.44304	5.01e-11	2.35883	2.62e-09	2.03642	0.000343872	2.07775	0.000337714
CDK18	-1.2258	9.49e-57	-1.93172	3.77e-06	-2.8073	1.68e-11	-2.18324	4.12e-06	-3.13569	2.52e-07
CDK19	-1.90425	1.01e-129	-2.14545	1.45e-07	-2.97165	6.3e-13	-3.03217	7.41e-10	-1.89405	0.00150219
CDKN1A	2.94557	0	2.26533	5.47e-10	3.60215	1.51e-28	3.00421	2.01e-14	2.28831	3.78e-05
CDKN2A	-7.14141	1.67e-49	2.76091	2.47e-12	4.2371	2.41e-30	4.23191	3.47e-25	3.09293	4.32e-08
CDKN2B	5.44294	2.52e-12	7.39718	1.46e-05	7.50943	6.75e-06	7.82214	3.44e-06	7.7504	1.21e-05
CDR2L	-2.24483	0	-3.5666	1e-21	-3.32749	9.4e-22	-3.28101	1.8e-15	-3.22495	1.37e-09
CEACAM1	1.03074	5.92e-16	3.17271	6.41e-16	1.84313	0.00166	2.6204	2.15e-08	2.71417	4.2e-06
CIC	-1.10265	3.13e-117	-1.76538	3.49e-05	-2.30607	1.28e-10	-2.2797	3.29e-08	-2.06956	0.00121689
CKMT1A	-2.58342	3.59e-181	-3.64845	9.73e-19	-2.25691	6.13e-09	-1.63176	0.000653832	-2.81891	8.11e-06
CKMT1B	-4.45247	0	-3.31042	1.81e-17	-1.99527	2.49e-07	-1.58354	0.000481471	-2.59564	2.86e-05
CLCN6	-2.99565	0	-1.98863	5.1e-07	-2.95515	1.14e-15	-2.53184	6.04e-09	-2.0399	0.000435448
CLIP2	-1.73697	0	-3.13087	1.64e-19	-3.40143	4.7e-24	-3.14287	3.43e-11	-2.9948	9.1e-08
CLMN	4.55897	2.2e-45	3.54815	1.49e-06	2.89198	0.000863878	2.90146	0.00154154	3.54316	8.92e-05
CNN1	-5.71882	4.16e-16	2.56443	2.19e-06	2.91292	6.07e-09	2.95971	4.41e-08	2.08171	0.00652594
CNNM1	-12.8761	0	-8.22866	4.29e-89	-7.60893	6.05e-74	-6.68568	4.01e-56	-7.35049	1.07e-35
CNRIP1	-12.4548	0	-3.9432	1.25e-20	-2.5075	5.65e-09	-2.36659	1.13e-06	-2.82195	6.19e-05
COBL	3.51972	3.01e-79	2.32738	0.000825	1.9799	0.00769	2.54121	0.000283	2.98025	8.07e-05
COL1A1	-1.34971	1.23e-19	5.42912	4.38e-38	3.61362	2.52e-27	3.50376	4.13e-15	4.88597	6.36e-21
COL26A1	-9.51816	0	-1.93732	6.4e-06	-1.44041	0.000613839	-1.32457	0.00356163	-2.48104	5.76e-05
COL6A3	-5.31288	2.08e-52	7.79635	1.48e-118	6.3347	3.39e-81	6.39186	3.31e-60	7.00585	6.51e-38
COL7A1	-3.32819	2.35e-168	-2.55473	1.44e-08	-1.57025	0.000172469	-1.78857	0.000205699	-2.64365	2.04e-05
COTL1	2.04455	3.75e-140	4.67332	1.14e-44	4.32574	6.94e-34	4.63446	9.84e-23	4.31394	1.03e-15
CPNE8	-10.6609	1.55e-228	3.24462	1.41e-21	2.14168	6.69e-10	1.35695	0.00123452	1.58954	0.00584935
CPPED1	10.032	3.88e-259	9.50208	5.93e-05	8.89146	0.00016878	9.27367	9.41e-05	9.58937	9.36e-05
CRADD	-1.06336	1.34e-18	-2.79784	3.04e-07	-1.51492	0.00338722	-1.67562	0.00339667	-2.14539	0.00221137
CRTC1	-1.4923	4.25e-43	-2.10741	1.68e-05	-1.99333	7.87e-06	-1.78947	0.000710729	-1.81439	0.00471832
CTPS1	-1.06867	5.23e-58	1.45733	8.15e-05	1.43788	0.000536709	1.24599	0.00352253	1.79429	0.00174958
CUBN	-9.29232	4.75e-246	1.94639	5.03e-07	1.36729	0.000352964	1.78454	1.61e-05	2.12982	0.000111595
CYB5R2	9.70908	8.93e-35	9.56472	5.47e-05	10.3734	5.18e-06	10.582	3.65e-06	8.47542	0.0011001
CYFIP2	2.84457	1.22e-116	3.39906	6.01e-18	2.90958	5.4e-12	3.14913	5.42e-12	3.94661	3.36e-13
CYP1B1	-4.57814	5.91e-217	3.76628	6.64e-26	2.72313	1.36e-16	2.58891	1.88e-11	2.89319	6.42e-08
CYTH1	-2.82512	0	-3.7982	2.61e-27	-3.93964	8.54e-29	-3.89722	1.18e-21	-4.01312	1.64e-14
DCAF13	1.47375	9.35e-106	2.19724	6.06e-10	2.51966	9.44e-12	2.06025	4.42e-07	1.96552	0.00185893
DCLK2	-3.17544	1.31e-26	3.15064	1.07e-15	3.69456	9.13e-24	3.12301	4.87e-12	2.91065	3.81e-07
DDX58	-3.15327	2.81e-238	-2.63041	5e-11	-3.88136	7.6e-21	-3.69424	1.11e-15	-2.75658	2.26e-06
DDX60L	2.37069	4.97e-25	2.92648	1.03e-08	1.83897	0.00209537	2.15412	0.000496445	2.69528	8.4e-05
DERA	2.33272	3.48e-91	1.68492	0.000456334	2.07002	4.81e-06	1.87287	0.000466031	2.06402	0.00122882
DHRS2	-2.90067	4.42e-16	3.17255	2.09e-13	3.06159	3.35e-09	4.84506	1.13e-31	4.73963	1.18e-18
DHRS4L2	2.99013	1.3e-11	2.80615	0.00935906	5.09394	4.45e-13	5.32863	1.56e-13	3.47234	0.00132868
DIXDC1	-2.28293	1.97e-158	-1.09158	0.00834939	-2.81419	3.16e-12	-2.7849	1.34e-09	-2.04334	0.000659553
DKK1	-12.3151	0	2.0427	3.56e-07	2.8232	9.71e-17	2.55665	6.78e-11	2.83566	1.74e-07
DLG2	-4.17719	1.1e-52	-3.33442	2.39e-06	-6.04679	2.7e-10	-5.56782	9.7e-10	-5.86676	3.3e-09
DLX2	-7.81624	0	-1.58051	5.41e-06	-1.7352	1.08e-07	-1.65893	1.92e-05	-1.917	0.000450763
DMD	-2.67187	6.2e-104	4.26494	2.72e-36	2.7736	1.36e-16	2.37532	2.62e-09	3.482	3.49e-11
DNMT3A	-2.14926	1.31e-152	-1.54403	0.000478731	-2.35051	6.68e-08	-1.92794	3.13e-05	-1.904	0.00375044
DOK1	1.84419	1.85e-28	2.94485	1.04e-10	4.62074	2.46e-33	5.14856	1.71e-31	4.00677	1.52e-12
DOT1L	-1.31143	2e-146	-1.62625	8.76e-05	-2.14834	1.57e-09	-2.37182	1.22e-08	-2.08373	0.00113471
DPY19L2	-6.8437	1.45e-103	-2.41839	2.37e-05	-2.3156	4.3e-05	-2.1559	0.000415251	-2.59649	0.000502938
DSE	-7.11737	0	-2.00603	1.05e-08	-2.33725	2.74e-12	-2.31526	7.55e-09	-2.24589	4.47e-05
DUS4L	1.72544	6.01e-16	1.89827	0.00425752	1.86957	0.00489614	2.07028	0.00220135	2.61425	0.000349565
DYNLT3	12.25	0	8.99989	0.000195509	9.31629	6.15e-05	9.20628	0.000102369	9.38364	0.000152049
DYRK3	-1.16037	3.39e-41	-1.69293	0.000416893	-2.05433	6.05e-06	-2.37051	1.31e-05	-2.01605	0.00192059
EBI3	2.82802	5.25e-15	3.0168	0.000487829	2.98768	0.000788762	3.73183	2.9e-06	3.45253	0.00258654
ECH1	-1.13301	1.37e-231	-2.97332	2.43e-18	-1.88758	1.33e-08	-1.65835	2.53e-05	-2.14947	0.000126546
ECM1	2.77735	6.35e-33	3.53984	2.66e-10	2.39151	0.00125868	3.96531	2e-08	4.68573	1.51e-10
EFNA5	-5.51487	0	-5.50392	1.79e-31	-5.39253	1.18e-44	-5.90313	4.94e-41	-3.68789	1.85e-11
EIF2AK2	-1.40807	1.24e-249	-2.1792	9.08e-10	-4.65438	1.17e-39	-4.52941	2.87e-29	-2.86702	1.91e-05
EIF2B3	2.57385	3.51e-82	2.2207	5.95e-06	2.92128	1.28e-10	2.98673	9.66e-09	2.16696	0.00118934
EIF4ENIF1	-1.78288	4.15e-146	-1.21282	0.00217272	-1.19201	0.00182464	-1.73793	8.43e-05	-1.55726	0.00965007
ELOVL6	-1.88398	0	-1.84884	3.02e-07	-2.93954	2e-16	-2.74709	7.84e-12	-2.15431	0.000122117
EMC10	1.76086	2.12e-225	-6.34653	4.87e-33	-8.47235	1.53e-25	-9.87479	1.02e-16	-8.54927	1.38e-20
EME2	-1.99788	1.53e-139	-4.0172	1.07e-18	-6.01151	8.52e-37	-5.44872	1.26e-27	-4.22922	6.51e-10
EOMES	-3.62449	0.000459	5.93289	1.57e-26	5.86566	2.84e-25	5.89489	2.36e-20	4.82595	1.51e-10
EPAS1	5.42979	7.29e-144	2.97452	0.000589984	3.66601	1.27e-05	3.35425	0.000132351	4.6829	8.28e-10
EPHA5	-3.70044	0.000472	7.24791	2.53e-37	5.74234	4.43e-21	5.68495	2.89e-18	6.73947	4.07e-20
ERAP2	6.04836	0	5.27654	1.77e-24	4.69889	1.84e-19	4.29606	5.42e-12	3.86454	6.17e-08
ERICH1	-1.99465	1.18e-126	-2.15711	7.55e-07	-1.96366	3.66e-06	-2.17068	1.03e-05	-2.90821	1.65e-06
EXOC6B	-1.1894	2.81e-28	-1.80555	0.00058667	-5.25649	6.4e-18	-5.32287	7.6e-13	-2.42191	0.00152233
EXOC7	-1.81829	0	-1.51336	2.62e-05	-2.01366	2.05e-09	-1.841	1.26e-05	-1.7183	0.00227676
EXT1	2.27251	1.83e-133	2.18689	5.78e-08	1.61827	0.000137419	1.80376	9.66e-05	2.07315	0.000453237
FADS2	-1.64488	1.59e-56	2.46388	6.46e-12	1.89384	7.43e-08	2.6088	3.8e-11	2.64646	1.14e-06
FAM111B	8.50621	9.32e-240	6.33815	6.44e-07	5.01023	0.000673115	5.53173	0.000196028	6.70162	7.41e-07
FAM114A2	1.30588	2.46e-15	1.80533	0.000532073	1.72386	0.000772908	1.69616	0.00287838	1.9105	0.00722709
FAM117A	-2.02201	9.8e-105	-2.56826	1.88e-09	-2.6936	2.33e-10	-2.43248	2.44e-06	-2.67557	1.17e-05
FAM210B	1.95192	2.28e-60	1.66454	0.000439992	1.63826	0.000380618	1.98995	4.38e-05	1.91806	0.00406469
FAS	1.55824	2.07e-36	2.75401	9.66e-12	2.62751	2.57e-10	2.6458	3.94e-09	2.84286	6.29e-07
FASN	-2.1935	0	-2.00466	3.78e-06	-3.53955	1.48e-30	-2.71803	1.48e-10	-2.21963	0.000555782
FAXDC2	-7.96723	0	-2.1965	2.54e-07	-2.99613	2.77e-15	-2.59898	2.81e-09	-2.27181	9.52e-05
FBLN1	-7.27447	0	-1.4473	0.000126594	-1.29113	0.000209861	-1.16644	0.00517326	-2.34182	4.86e-05
FBLN7	-9.21917	2.7e-70	-6.82525	4.85e-12	-7.26811	2.58e-10	-7.97877	5.52e-09	-5.4936	2.81e-08
FBXL7	-10.6175	1.31e-283	-4.12945	2.16e-19	-3.62657	2.28e-11	-3.99604	2.3e-14	-2.84826	2.76e-06
FBXO22	-1.89673	0	-2.24634	1.67e-10	-2.20257	1.59e-10	-2.28385	7.28e-09	-2.08441	0.000315601
FDPS	-1.68853	0	-1.83645	4.99e-08	-1.78617	3.29e-08	-1.50961	0.000108002	-1.59808	0.00419669
FGF18	-5.0163	1.52e-289	-4.66177	1.39e-21	-4.00094	2.7e-19	-5.17943	1.67e-20	-6.15503	2.8e-17
FLNC	-9.34096	0	-5.89079	5.43e-35	-8.3085	2.82e-05	-8.88015	4.12e-34	-7.91662	1.31e-30
FLRT3	4.70044	1.39e-05	14.5377	5.03e-11	13.6822	4.59e-10	13.6165	8.32e-10	14.0513	6.7e-10
FOXN4	-9.36085	5.29e-178	-2.33326	1.51e-06	-2.4947	4.14e-06	-3.12601	2.54e-08	-2.88848	9.83e-06
FREM2	-8.99435	0	-6.1238	6.78e-37	-10.1422	1.27e-18	-8.39252	1.57e-29	-7.76585	2.67e-25
FUCA2	11.838	0	9.31902	7.27e-09	9.60532	1.22e-09	9.57922	2.56e-09	8.85887	2.19e-07
FZD1	-2.36923	1.28e-66	-2.71105	2.11e-06	-2.9824	1.15e-07	-3.07789	9.16e-08	-2.82306	3.4e-05
FZD2	-4.29261	0	-3.03353	2.09e-13	-3.10176	2.34e-19	-2.76633	7.68e-12	-2.91899	5.2e-08
FZD6	10.1799	7.67e-161	8.34063	0.000915919	8.03632	0.00127942	7.14297	0.00923	7.54662	0.00726898
FZD7	-2.94317	0	-2.71689	6.26e-15	-3.15004	5.82e-21	-3.49548	3.4e-17	-3.5262	2e-11
FZD8	-12.2432	0	-1.54948	4.41e-05	-1.03779	0.00653646	-1.265	0.00472618	-2.08425	0.000459012
G6PD	1.39389	7.94e-211	-1.43193	0.00126568	-1.72851	0.000138935	-1.52067	0.00366772	-1.94342	0.00362289
GADD45A	1.20925	3.71e-26	1.54715	0.00149316	2.38364	1.14e-09	2.58217	3.33e-09	2.85254	6.54e-07
GALNT10	3.10753	1.69e-153	1.81398	0.000373187	1.50105	0.0050597	1.53079	0.0084043	2.09044	0.00201339
GALNT4	-2.26189	4.96e-69	-1.97307	0.000244522	-5.34	1.73e-18	-4.85381	8.24e-13	-3.09893	0.000290176
GDF11	-1.27908	8.92e-164	-1.69089	1.78e-05	-2.85945	2.08e-13	-2.48591	1.35e-08	-2.7426	1.18e-05
GDF15	3.53582	0	2.45999	7.84e-09	4.03561	6.49e-34	4.17711	7.19e-24	3.52223	1.66e-11
GLA	-2.62215	0	-2.82211	6.55e-15	-2.66484	8.09e-14	-2.77148	3.57e-09	-3.43553	1.15e-09
GLB1L2	3.69951	2.4e-255	1.92525	0.000126594	2.33864	5.19e-07	2.58808	1.4e-07	2.22923	0.000819799
GLIPR2	-5.54689	1.99e-12	2.8742	1.65e-07	3.44773	3.55e-11	3.65817	5.42e-12	2.77836	9.2e-05
GLIS2	-1.9482	2.68e-116	-2.05762	4.59e-06	-1.9243	1.82e-06	-1.69117	0.00142524	-1.71289	0.00554762
GLUL	1.54261	4.55e-260	-5.38471	3.07e-32	-5.96467	4.24e-34	-7.72857	1.51e-33	-6.41962	6.78e-23
GM2A	3.27302	7.56e-282	2.12173	7.84e-07	2.11568	2.66e-06	2.35552	4.3e-07	1.78943	0.0052438
GNAI1	-8.91886	3.67e-208	3.3639	1.48e-22	3.888	4.05e-35	3.77126	1.02e-23	3.98851	2.16e-15
GNPDA1	1.06481	1.11e-33	1.24513	0.00336365	1.52653	0.000423842	1.93185	2.24e-05	1.99478	0.00255234
GPC5	-10.6804	1.02e-224	-2.29059	4.58e-07	-3.35926	6.11e-12	-3.53086	1.42e-11	-2.69437	8.03e-05
GPER1	-4.15367	1.82e-306	-4.48716	2.16e-22	-3.59841	3.7e-17	-3.37361	1.3e-11	-3.888	2.47e-11
GPM6A	-10.4737	3.8e-159	-5.02396	5.78e-17	-6.65564	1.58e-20	-8.45724	1.26e-15	-5.40216	1.05e-11
GPR89A	-2.4777	6.03e-293	-4.41407	1.07e-30	-3.80812	6.31e-25	-3.91592	1.21e-18	-4.22135	2.09e-14
GPX1	10.49	0	8.23222	4.58e-12	10.254	4.31e-20	10.7682	2.46e-21	8.95661	2.04e-13
GSG1	-2.1592	0.000396	3.86343	1.96e-10	4.16785	7.79e-10	4.65194	9.09e-16	4.59703	6.49e-10
GSPT1	-1.55078	0	-1.85615	2.93e-08	-2.07386	7.22e-11	-2.35333	7.75e-10	-1.84972	0.000751496
GTF2H2	-1.04173	5.62e-26	-2.85803	1.03e-08	-2.84585	3.46e-09	-2.95879	2.94e-08	-2.62637	4.17e-05
GTF2I	-1.70108	0	-2.24932	2e-11	-5.01375	3.92e-54	-5.20188	3.37e-37	-2.86313	5.92e-07
HELZ2	6.41316	5.39e-256	4.41775	3.13e-07	3.10292	0.00182283	3.66662	6.68e-05	4.08539	7.64e-05
HERC5	-5.75489	2.59e-170	-3.82447	4.09e-14	-2.88965	2.48e-09	-2.66076	5.18e-07	-2.81031	3.5e-05
HERPUD1	2.14538	1.82e-304	1.05993	0.00985281	2.23562	1.63e-09	2.10648	8.54e-06	2.32228	0.000335942
HID1	-2.90233	0	-6.46511	4.53e-56	-4.85053	1.05e-37	-4.35175	5.04e-20	-4.99587	3.35e-19
HMBOX1	-1.48814	3.9e-86	-2.89932	1.18e-11	-5.10499	1.54e-28	-5.2196	1e-24	-3.497	2.47e-05
HOXB2	-5.12175	0	-5.02193	7.17e-43	-3.70784	1.06e-26	-3.20607	9.28e-16	-4.32387	1.48e-15
HOXB4	-2.42741	1.43e-260	-5.79449	5.45e-45	-4.72668	2.36e-33	-4.14618	2.72e-21	-5.66795	1.64e-23
HPS4	-2.84594	0	-2.74507	2.87e-15	-2.97026	1.11e-17	-2.84151	7.19e-12	-2.43162	7.36e-06
HSD17B7	-2.07935	1.36e-128	-2.36051	7.84e-09	-3.21566	1.04e-12	-2.85457	5.24e-10	-2.74161	8.03e-06
HSD3B7	-3.28841	0	-3.99253	2.58e-25	-2.77507	4.51e-15	-1.98542	6.96e-06	-1.69233	0.00331
HSPA1A	-6.98544	1.52e-234	-3.52848	8.28e-11	-2.89478	1.41e-10	-3.22267	1.88e-09	-4.04763	2.41e-09
HSPA1B	1.29761	0	-2.42189	5.98e-10	-1.09018	0.00192938	-1.09196	0.00862062	-2.21171	0.00107186
HTRA1	-1.89909	9.41e-53	-5.30949	4.68e-20	-3.03422	4.5e-09	-1.66038	0.00314	-3.14389	1.61e-05
IFI6	-2.91279	0	-5.07776	9.04e-41	-2.75542	2.49e-12	-3.30729	7.51e-16	-5.67051	7.96e-28
IGF1R	-2.22607	3.85e-136	-3.7487	1.23e-17	-5.6833	1.73e-29	-4.63108	7.25e-20	-3.03497	7.16e-06
IL1RAP	6.88874	1.79e-49	7.21816	2.76e-05	6.25394	0.000484	6.06003	0.00114073	6.8373	0.000239
INPP4B	-9.33651	0	-1.7554	4.14e-05	-2.43938	1.3e-08	-2.25722	4.68e-07	-1.72283	0.00644394
INPP5D	2.77897	5.22e-32	3.09471	6.34e-07	2.37908	0.0012954	3.12758	1.76e-06	4.03651	1.62e-09
IRF2BPL	-2.0063	3.33e-177	-1.57485	0.000365756	-1.26083	0.00203677	-1.41852	0.00106437	-1.7156	0.00515665
ISG15	-1.00972	1.08e-72	-3.78639	5.85e-16	-1.84075	4.13e-07	-1.37854	0.00201117	-4.2019	1.76e-14
ISL1	-11.1793	2.93e-220	2.59714	2.61e-14	2.89376	9.51e-18	2.38172	9.63e-10	1.69746	0.00494146
ITGA1	-3.12928	9.72e-11	4.62328	5.21e-28	3.3169	2.63e-12	3.0277	3.57e-08	4.90802	8.32e-16
ITM2C	-1.06296	0	-1.71945	5.54e-07	-1.01464	0.0024752	-1.17652	0.00308419	-2.31389	2.27e-05
ITPKB	-1.56114	1.04e-60	-6.44892	4.74e-25	-8.86234	9.24e-19	-6.39329	3.08e-23	-5.81574	2.51e-17
JAM2	-8.18364	1.13e-153	-2.21916	9.69e-06	-2.89124	6.42e-08	-2.51525	8.42e-05	-2.37426	0.000509532
KCNC3	-4.31708	0	-1.81571	8.91e-07	-2.87278	2.27e-12	-2.58408	8.57e-10	-1.90771	0.00336594
KCNMB4	1.43558	5.2e-15	4.07439	3.34e-24	4.62395	3.47e-33	4.72029	3.86e-23	3.64456	1.58e-09
KCNN4	6.9709	1.88e-80	4.67659	0.0025003	4.68345	0.00351734	6.44184	6.81e-07	6.29083	2.62e-05
KHDC1L	8.85487	2.27e-08	9.72251	4.14e-05	7.97106	0.00141349	10.6283	4.61e-06	10.0701	4.71e-05
KIF3C	-1.50978	1.21e-61	-1.5673	0.000349171	-2.33576	8.23e-08	-2.13028	3.87e-05	-1.90964	0.00280955
KITLG	7.68586	0	8.53677	1.13e-42	8.04414	4.6e-38	7.50514	1.36e-29	7.77634	2.67e-25
KLF10	2.04241	7.04e-178	3.24096	4.01e-19	2.9612	3.55e-16	2.13301	2.66e-07	1.90678	0.000928821
KLHL29	2.62882	1.18e-15	4.4033	1.78e-12	3.68785	1.66e-07	3.73496	7.87e-07	4.39547	3.77e-09
KPNA5	-2.00286	2.86e-127	-3.57111	2.39e-18	-4.94907	1.31e-27	-5.0694	4.23e-26	-3.66231	1.3e-10
KRT10	1.99798	3.37e-21	2.07913	0.000880234	3.91327	5.42e-17	3.6433	1.24e-12	3.27298	9.83e-06
LAMC3	2.02046	1.08e-32	2.43012	2.08e-05	2.24465	6.23e-05	2.90103	1.77e-07	2.46326	0.000673425
LCP1	4.32193	4.07e-05	6.412	0.00042933	10.6725	9.42e-12	11.797	1.09e-13	6.75432	0.000307446
LIMA1	-1.23454	0	-1.45513	0.000172702	-2.27841	4.78e-09	-2.89902	1.59e-13	-2.09674	0.000364331
LMCD1	1.92992	3.93e-26	1.63249	0.00964206	2.66997	7.67e-08	2.65041	1.66e-06	2.90343	5.17e-05
LMO4	-1.4486	1.51e-57	2.10599	1.66e-09	2.30695	4.28e-12	1.94483	1.04e-06	2.09929	0.000350334
LOXL2	-9.12799	0	-1.52532	4.46e-05	-3.39001	2.57e-23	-3.57785	6.67e-19	-2.90511	1.7e-05
LRCH3	-1.0938	4.69e-18	-1.29541	0.00406955	-4.28747	3.35e-18	-4.08109	3.54e-13	-1.99164	0.00352261
LRRC8C	-7.30378	1.75e-228	-1.80528	0.00015126	-3.15062	6.24e-12	-2.69834	1.19e-07	-2.26761	0.000669361
LRRTM4	-9.77643	4.52e-126	3.2577	5.43e-21	3.52597	5.37e-27	3.08162	2.74e-15	3.30102	1.16e-09
LSS	-1.28649	2.5e-219	-2.81751	6.28e-13	-2.69248	2.27e-12	-2.90717	3.3e-13	-3.19012	2.43e-09
LUM	-14.2614	0	-5.4071	0.00685033	-6.4132	4.17e-68	-10.1426	2.78e-67	-8.16766	1.57e-41
LZTS3	-2.38167	2.85e-50	-2.29501	4.61e-05	-1.96807	0.000464663	-1.88135	0.0016968	-1.98277	0.00772654
MAB21L3	-1.22077	1.05e-226	-3.36983	2.31e-20	-4.56956	1.26e-32	-4.61721	3.69e-29	-4.08675	9.43e-14
MAGOHB	1.25182	3.13e-18	1.91184	4.5e-05	2.58819	3.65e-10	2.44024	3.71e-06	1.98547	0.00257416
MAML2	1.34577	0.000802	5.23009	1.39e-25	3.66013	1.24e-09	3.36608	8.88e-07	3.70306	4.16e-07
MAN1A1	2.61587	0	-3.17403	1.3e-09	-3.76209	3.81e-12	-3.826	1.34e-10	-2.38251	0.000346
MAP1A	-5.1822	0	-1.21113	0.0046651	-2.59376	2e-08	-2.30763	1.62e-08	-2.52341	7.29e-06
MAP2K6	-4.08746	0	-1.90183	4.97e-06	-1.89792	4.12e-07	-2.00961	9.18e-05	-3.35345	2.74e-05
MAP3K1	2.38348	7.13e-52	3.33497	4.26e-10	2.48142	3.01e-07	1.95153	0.000909938	3.50315	2.47e-09
MAP3K13	1.15754	2.74e-05	2.39814	0.000379786	2.79256	5.54e-06	2.45995	0.000445388	2.28639	0.00752129
MAP9	-9.33092	0	-3.70335	3.04e-25	-4.84876	3.69e-41	-5.76214	4.65e-42	-6.12885	2.42e-27
MBP	5.82814	7.65e-166	7.88496	3.02e-24	6.70602	2.49e-16	7.59763	1.21e-21	8.66772	1.3e-24
MCOLN1	-2.51408	5.02e-197	-2.78451	7.13e-11	-2.39627	6.55e-09	-1.8132	4.11e-05	-2.36229	4.71e-05
MEST	2.59212	2.19e-297	6.97979	4.04e-103	5.55593	8.4e-63	5.62346	3.82e-32	5.08132	9.47e-23
METTL7A	3.96963	1.63e-25	7.85362	3.19e-32	8.6679	2.08e-33	8.59546	8.36e-33	6.73248	1.54e-15
MGST2	8.9684	0	5.43796	1.43e-06	6.36605	7.3e-10	6.43448	4.13e-09	5.34182	3.76e-05
MME	-5.7866	6.05e-55	5.85271	2.52e-66	5.50999	1.43e-60	5.23288	1.29e-37	6.10593	1.38e-34
MMP1	4.18519	6.88e-47	4.58806	1.62e-10	5.93937	5.83e-19	6.74832	2.97e-28	7.00361	2.7e-17
MMP10	-9.87191	5.62e-301	2.23611	4.58e-10	3.67046	2.23e-18	3.39401	6.47e-20	3.87055	2.08e-12
MMRN1	-10.0888	5.45e-226	-2.52915	2.73e-07	-7.49595	1.37e-25	-7.16957	1.53e-22	-5.33361	2.63e-12
MOCOS	8.35315	8.98e-80	7.38344	1.6e-05	8.12531	9.54e-07	8.4177	4.42e-07	8.95732	1.4e-07
MRC2	-5.35317	0	-2.18139	2.92e-09	-1.81019	5.47e-08	-1.68171	0.000107568	-1.7388	0.00217954
MRPL51	1.48331	1.09e-152	1.09525	0.00487804	2.98815	6.55e-20	2.84985	1.74e-11	1.79343	0.00823563
MRPS35	1.06643	2.49e-118	1.12558	0.00250032	1.62923	1.44e-05	1.56752	8.32e-05	1.86793	0.00192059
MRPS6	-1.83953	0	-3.55534	1.38e-25	-2.1207	1.83e-09	-2.46714	2.76e-10	-2.83929	1.09e-05
MT1A	15.5533	5.27e-258	9.11534	0.00015	10.462	3.69e-06	11.4896	3.94e-07	10.5682	1.03e-05
MT1X	5.65222	8.16e-285	3.82273	3.11e-08	5.8806	4.75e-31	5.95323	6.29e-29	5.39718	8.68e-17
MT2A	5.69857	0	2.40761	1.2e-08	4.68165	3.65e-43	5.03901	7.46e-39	4.04377	4.35e-14
MTRNR2L1	-2.90321	0	-3.06758	2.1e-18	-1.93831	2.12e-08	-2.34064	7.05e-09	-2.78602	1.6e-06
MTRNR2L2	-2.28594	0	-3.31819	4.15e-25	-3.999	2.45e-39	-4.07443	1.27e-29	-3.45088	1.41e-11
MTRNR2L8	-2.46478	0	-4.66264	1.44e-49	-4.97009	1.13e-58	-5.06085	4.89e-45	-4.74868	3.06e-21
MTRNR2L9	-2.11169	7.84e-38	2.6258	5.22e-13	2.66344	2.64e-14	2.6898	3.81e-11	2.57894	3.03e-06
MTUS1	2.74959	3.65e-56	2.23248	0.000106	1.83935	0.00312	1.95459	0.00307	2.54261	0.000238461
MYO1B	6.84385	0	5.20423	6.98e-19	3.46015	3.95e-06	3.62841	2.54e-06	4.26331	8.68e-08
MYRFL	7.12928	1.71e-16	7.95866	0.00203	9.3171	6.15e-05	10.0462	1.68e-05	7.96238	0.00317352
NANOS1	1.1017	1.25e-05	1.80049	0.00770059	3.03704	5.28e-09	2.74343	2.92e-06	2.33683	0.00375793
NBPF10	-1.3347	1.94e-49	-3.37235	7.32e-13	-5.86945	5.37e-27	-6.58827	1.23e-25	-3.87324	2.56e-06
NBPF8	-3.15113	3.71e-165	-3.23642	5.56e-13	-6.69563	1.86e-30	-5.70242	7.5e-25	-3.41809	2.05e-07
NCAM2	-8.8928	2.23e-256	-2.81533	4.67e-08	-3.51472	4.94e-14	-4.43228	1.61e-17	-4.09131	2.22e-11
NEBL	1.91107	5.27e-40	5.42058	9.04e-41	4.29103	2.59e-30	4.08096	5.19e-16	3.30805	2.9e-08
NEURL1B	5.23734	1.62e-274	2.233	0.0027123	2.12304	0.00471122	2.21285	0.00467034	3.01695	6.3e-05
NKD1	7.5157	2.04e-249	4.87259	2.45e-07	3.39188	0.00600767	3.60018	0.00343768	4.56523	0.000110339
NOMO2	-2.5482	0	-3.48262	1.72e-22	-6.26322	1.99e-59	-5.89796	1.45e-41	-3.7542	1.82e-10
NPAS2	-2.49059	1.64e-115	-2.04747	4.17e-06	-2.51578	1.25e-08	-2.33504	1.98e-06	-2.5262	4.85e-05
NR1D2	4.24305	0	2.19153	4.22e-05	1.99553	8.87e-06	1.81413	0.00142524	2.61922	1.04e-05
NR2F2	10.6991	0	7.78079	3.58e-06	8.05106	8.33e-07	7.79362	3.4e-06	7.92307	7.21e-06
NSG1	4.91886	1.28e-09	6.12309	0.000983187	6.76801	9.12e-05	7.39069	1.44e-05	5.46878	0.00972395
NUPR1	5.22668	1.45e-183	4.82058	6.31e-19	7.64081	1.12e-57	7.69286	2.54e-44	6.60738	6.48e-22
NYAP1	-4.34308	3.05e-99	-2.38069	8.78e-06	-2.60962	3.42e-05	-1.95962	0.00224875	-1.88328	0.0096164
OAS2	-8.6865	0	-2.27018	1.53e-06	-4.334	2.75e-22	-3.93975	1.86e-16	-4.89341	2.86e-16
OFD1	1.62078	7.11e-24	2.14712	1.89e-07	1.95332	1.64e-06	1.82739	0.000102483	2.21997	0.000155733
OGFRL1	4.42626	1.95e-71	3.80023	7.6e-07	3.8923	5.47e-08	3.39527	5.93e-05	4.27317	9.33e-08
OLFM2	-8.18315	0	-2.54367	3.52e-10	-2.82556	6.7e-13	-2.47089	4.54e-08	-2.81757	1.91e-06
OLFML1	-8.82456	0	-5.75323	2.61e-35	-6.19412	3.99e-35	-5.02396	2.16e-24	-7.8994	1.19e-25
OMA1	1.36559	1.27e-13	1.8694	0.000669681	2.10224	5.04e-05	2.16713	0.000197165	2.01609	0.00785418
ONECUT2	-2.69161	1.57e-144	-2.11269	1.64e-06	-3.07024	2.79e-09	-3.29926	1.26e-11	-4.3273	2.04e-12
PACRGL	1.22239	1.18e-13	2.26936	3.67e-05	1.76486	0.0038808	2.05612	0.000806847	2.00108	0.00783144
PARP15	-1.17747	3.77e-31	-1.6144	0.000886375	-1.94272	2.86e-05	-1.92008	0.000222485	-2.0689	0.00150138
PAX9	-4.67422	0	-7.46342	2.2e-56	-6.88425	9.22e-58	-6.80951	2.16e-46	-7.14222	1.86e-33
PCDH1	9.82018	8.07e-133	12.956	6.4e-09	12.7661	8.31e-09	13.1271	4.3e-09	13.4941	3.72e-09
PCDHB2	-8.47168	1.79e-116	-2.29087	3.7e-05	-2.68628	8.27e-06	-1.90019	0.00180159	-2.30147	0.00127149
PCDHGC3	-9.14946	0	-3.4124	4.13e-20	-7.96622	3.18e-59	-7.45944	1.7e-49	-4.79918	2.4e-14
PCED1B	8.55075	3.82e-29	10.7276	2.9e-06	10.5248	3.15e-06	9.78043	2.58e-05	9.85942	5.52e-05
PCGF2	-1.58753	4.53e-112	-2.15753	3.28e-08	-2.64207	5.58e-11	-1.90777	0.000388631	-1.56573	0.00986975
PCK2	1.26295	8.12e-99	1.09373	0.00605485	2.35682	4.84e-10	2.4782	5.93e-08	2.24308	4.15e-05
PDCD4	2.0163	2.04e-109	2.33565	1.73e-09	2.20042	2.14e-08	1.56801	0.00120866	1.9144	0.00185105
PDE4C	-6.25334	1.72e-84	-2.84047	4.92e-06	-3.53415	1.52e-07	-3.13973	5.15e-06	-2.81548	0.000212294
PDE4DIP	-1.35666	6e-122	-1.98196	1.75e-07	-3.43847	1.32e-17	-3.3257	6.37e-15	-2.46554	3.4e-05
PDE9A	4	2.14e-12	4.4006	0.00091552	5.3749	2e-06	5.2142	1.54e-05	4.35821	0.0024369
PDGFRA	-10.6018	0	-1.76442	0.000127	-5.64651	1.74e-35	-6.49633	7.96e-31	-5.77834	3.23e-12
PDGFRB	-4.12276	0	-1.56213	7.31e-05	-3.66924	1.69e-20	-4.63786	3.79e-24	-3.41773	6.26e-08
PELI2	3.44294	5.83e-14	5.61716	2.03e-12	4.70423	1.12e-07	4.41273	5.86e-06	4.3716	3.52e-05
PERP	4.26045	0	2.20011	1.07e-08	2.7974	5.33e-15	2.43482	2.89e-09	2.2994	5.59e-05
PGS1	-1.31795	4.19e-85	-1.93072	6.26e-06	-1.90527	4.45e-06	-1.68162	0.000325244	-1.96038	0.00142885
PHF11	5.63958	3.72e-55	5.63436	4.44e-09	5.76269	9.64e-10	5.40448	1.16e-07	5.55293	3.24e-07
PHLDA1	6.96608	0	5.3308	1.47e-19	5.67093	2.16e-34	4.97568	3.5e-20	5.64084	1.38e-13
PHYHD1	-9.53552	0	-2.99639	6.2e-13	-1.71812	2.09e-05	-1.92245	2.32e-05	-2.78846	2.6e-06
PI15	-5.78136	5.51e-16	6.18626	8.25e-53	4.86702	1.56e-32	4.9803	2.81e-23	6.95872	1.28e-37
PIANP	-10.2854	0	-2.32073	2.07e-08	-2.0933	1.15e-07	-1.89008	0.000316118	-3.10433	1.14e-06
PIAS4	-1.02322	1.37e-42	-1.90313	9.1e-06	-1.54957	0.000190844	-1.55623	0.000682664	-1.83827	0.00268921
PLGRKT	2.50486	5.69e-32	2.23058	0.000474152	3.3849	8.54e-11	3.33456	2.08e-09	3.31647	1.31e-05
PLIN2	10.4351	0	8.11323	1.19e-06	9.26759	7.19e-09	8.93609	4.05e-08	8.44963	1.12e-06
PLK2	3.61236	1.59e-273	7.97244	4.03e-95	7.45197	6.45e-98	7.33286	1.15e-80	7.40235	1.09e-48
PLOD2	-13.551	0	-7.94673	9.33e-66	-11.1773	5.89e-51	-10.7898	3.92e-55	-9.57686	5.35e-50
PLSCR1	-1.34023	2.05e-43	-3.66223	2.25e-15	-3.93958	1.26e-16	-4.06147	2.83e-14	-2.82152	9.84e-06
PLXNC1	-2.94404	7.76e-57	-2.16733	0.000265165	-3.00065	6.57e-07	-3.61503	8.51e-08	-2.46763	0.00171439
PMAIP1	10.7211	6.71e-125	10.8797	1.97e-06	10.7379	1.83e-06	10.6682	3.15e-06	11.0127	3.42e-06
PNPLA6	-1.81516	0	-2.80629	2.43e-15	-2.12475	2.7e-10	-1.56314	8.73e-05	-2.14443	0.000151174
POC1B	-1.24982	4.25e-41	2.90576	1.14e-15	2.67065	1e-12	2.73592	1.53e-12	3.33172	7.55e-11
PODXL2	6.18811	8.65e-124	5.9525	1.8e-14	6.13219	7.92e-16	6.83521	2.21e-19	5.85805	2.92e-11
POLR3GL	2.65994	1.73e-55	2.23839	8.41e-05	3.66102	1.56e-16	3.73917	1.46e-14	3.19655	2.55e-06
PPARD	-2.03047	5.5e-195	-1.89865	1.4e-06	-2.63321	2.84e-12	-2.45428	3.16e-07	-1.86613	0.00194703
PPM1J	2.39689	2.62e-05	4.17792	1.51e-05	5.22257	3.03e-10	5.59391	2.58e-11	4.00675	0.000297
PRKAG1	2.26791	2.93e-125	2.07195	4.92e-07	2.78766	3.71e-14	2.75376	1.57e-10	2.81384	2.43e-06
PRKD3	-4.10096	0	-1.07001	0.00490933	-2.45893	1.26e-13	-2.91463	2.59e-13	-1.64825	0.0076449
PRNP	1.81338	4.57e-307	1.12073	0.00309336	2.19178	8.07e-09	1.89468	5.26e-06	2.28989	8.87e-05
PSD3	-2.8441	1.57e-137	4.05398	1.58e-31	2.17914	9.07e-10	1.94939	4.14e-06	3.44019	2.29e-09
PSTPIP2	-4.16993	8.14e-17	2.54754	4.07e-07	2.23102	3.41e-05	2.38726	2e-05	2.65199	4.33e-05
PTP4A1	1.47132	0	1.55726	3.7e-05	1.41161	0.000179185	1.12326	0.0089714	1.81223	0.000997936
PTPRU	3.34104	2.23e-234	2.09183	1.4e-05	1.83995	8.95e-05	2.33256	1.84e-06	1.91948	0.00358714
PXMP4	9.14466	2.27e-127	6.22234	0.000765214	6.30054	0.000439835	6.30511	0.000559256	6.24	0.00136034
QPRT	-10.0637	0	-4.61593	9.04e-41	-4.4314	4.04e-38	-3.8155	6.53e-22	-6.40425	8.26e-35
RAB3IP	2.13541	4.77e-37	1.28076	0.00612456	1.85374	5.85e-06	2.01252	5.87e-06	2.29927	5.58e-05
RAPGEF3	3.8365	4.8e-12	3.58338	0.0077661	5.23001	2.98e-07	6.44636	5.13e-10	5.47591	3.55e-07
RASGRP2	-6.62936	5.9e-18	2.43763	4.61e-06	3.65231	4.89e-16	4.02959	4.04e-18	3.20912	2.15e-07
RBM47	8.67293	0	8.89077	1.39e-20	8.17191	7.23e-17	8.64702	3.7e-19	9.40198	2.06e-20
RBMS3	-6.2854	6.95e-48	3.03191	8.59e-11	2.29673	1.45e-08	1.75762	0.000373492	1.88533	0.00495574
RBPMS	-5.00889	0	-1.38124	0.000166122	-1.68437	5.33e-07	-2.83935	3.59e-13	-3.60441	3.84e-12
RGS2	2.63813	3.34e-42	5.87113	9.29e-39	6.58912	8.54e-52	6.24416	2.58e-31	4.68917	1.3e-15
RGS3	-1.01099	5.23e-10	2.44893	2.99e-11	2.96061	5.93e-18	3.26642	6.31e-17	1.75582	0.00249616
RHEBL1	2.22426	2.94e-17	2.42866	0.00236706	3.75579	9e-12	3.59825	2.8e-09	3.10982	3.93e-05
RHOBTB1	-2.66091	2.57e-21	-4.02901	1.74e-05	-8.03383	6.3e-06	-8.12789	4.62e-06	-9.54677	6.23e-07
RHOC	1.81714	0	1.10701	0.00322405	2.60999	4.39e-16	2.92735	1.65e-14	1.56359	0.00950817
RIMKLA	-1.15726	5.23e-31	-2.00746	0.00162079	-1.29484	0.00759796	-1.95844	0.000170878	-2.14014	0.00127749
RIMS4	-6.12928	1.43e-14	2.83546	3.66e-07	1.8214	0.0041563	2.07836	0.00687012	2.58686	0.000207872
RNF125	2.0756	7.31e-27	2.27724	5.25e-05	1.86714	0.00589137	1.9521	0.0037479	3.24966	2.23e-07
RNF207	-1.58588	3.99e-64	-1.80084	9.03e-05	-2.32499	9.9e-08	-2.08975	2.14e-05	-2.23257	0.000304918
RNF24	-2.20373	1.51e-138	-2.19731	2.18e-07	-3.5997	5.82e-17	-4.24643	6.88e-18	-2.76538	3.66e-05
RPL22L1	2.88207	0	3.38102	1.93e-21	4.91022	2.79e-33	4.60465	9.09e-34	4.23762	2.18e-11
RRAS2	1.49764	5.02e-91	1.45579	0.000596343	1.98478	4.99e-07	1.54999	0.000313294	1.73342	0.00505462
RTBDN	-7.77756	7.24e-169	-2.35731	8.98e-06	-3.08297	1.18e-08	-3.32926	5.13e-09	-3.4781	1.45e-06
SAMD10	5.67948	8.15e-32	5.06361	0.00053614	5.94227	4.81e-06	6.37815	7.35e-07	5.63051	0.000138059
SAMHD1	-1.28407	5.61e-55	-2.47772	9.6e-09	-4.40485	2.23e-21	-4.11427	1.8e-16	-2.54877	6.23e-05
SATB1	-10.0649	0	-8.90628	9.94e-77	-11.3205	0.000755	-14.6469	6.45e-21	-9.93589	2.96e-43
SC5D	-1.29933	1.84e-179	-2.02248	1.45e-07	-2.87156	1.74e-16	-2.90632	7.79e-12	-2.00286	0.000456809
SDC2	-11.4823	0	-2.08555	2.85e-07	-2.96788	3.15e-13	-2.8289	8.51e-10	-3.29961	1.05e-08
SEL1L3	4.50321	0	2.76748	1.54e-10	2.93961	2.87e-10	3.19894	4.18e-10	4.13606	1.86e-14
SEMA3D	-8.28077	2.25e-251	2.27898	1.31e-06	-4.08062	1.29e-17	-5.99829	4.06e-23	-3.4705	3.78e-08
SEMA4F	1.20985	1.97e-12	2.12431	4.97e-07	2.16054	1.02e-07	2.46472	3.29e-08	2.13841	0.000371
SERPINB8	9.60918	1.43e-100	9.99656	1.84e-05	10.587	3.74e-06	10.8101	2.25e-06	13.0738	1.33e-08
SERPING1	-12.9374	0	-1.91499	3.17e-06	-2.05675	1.07e-06	-2.24943	2.72e-07	-3.20268	8.77e-09
SETD1A	-2.56874	0	-2.40193	3.47e-11	-2.77424	1.21e-16	-2.72411	7.14e-12	-2.42716	4.76e-05
SH3D21	-2.53405	5.05e-96	-1.23095	0.00915175	-2.38221	3.17e-07	-2.28156	1.02e-05	-1.97005	0.00737736
SHC1	-1.33394	0	1.33979	9.44e-05	1.44105	0.000307046	1.75487	4.25e-05	2.14928	6.41e-05
SHISA9	-1.16157	1.71e-48	-1.99823	6.57e-06	-2.35752	4.12e-07	-2.89202	3.26e-09	-2.14411	0.000390556
SHROOM3	-1.50039	4.62e-196	-1.30625	0.000438618	-3.01515	3.23e-17	-3.08693	1.84e-13	-2.04551	0.000308119
SIX2	-12.1264	0	-3.04016	3.7e-11	-2.7267	1.28e-11	-2.89679	7.91e-10	-2.48424	3.48e-05
SIX3	-10.8757	1.6e-200	-3.98822	1.71e-15	-3.62816	2.33e-13	-3.01966	1.13e-08	-3.51851	4.98e-08
SLC1A3	1.03337	1.85e-30	-2.15859	7.38e-05	-2.94088	1.83e-07	-3.28537	1.86e-07	-2.21611	0.00242574
SLC25A21	-11.0258	0	-3.74266	1.61e-18	-3.34583	1.83e-14	-3.34137	9.71e-12	-3.36462	1.68e-07
SLC25A37	-1.57344	9.64e-92	-1.75838	1.62e-05	-1.59288	5.66e-05	-1.57118	0.000760853	-2.28875	0.000171874
SLC29A2	-2.10042	0	-2.37156	1.64e-09	-2.36099	3.92e-12	-1.96912	8.87e-07	-2.31458	2.29e-05
SLC2A6	-2.43833	1.48e-110	-2.19116	9.92e-06	-1.94979	4.29e-05	-1.40198	0.00435527	-2.13547	0.00117993
SLC35G2	-10.1361	1.51e-234	-1.87737	0.00035797	-2.35436	2.49e-07	-2.25104	5.94e-06	-3.55156	5.83e-08
SLC38A4	-10.29	2.46e-197	-2.71094	1.25e-08	-3.66065	8.23e-13	-4.60432	1.52e-14	-4.03323	1.64e-08
SLC39A8	-6.25064	7.8e-59	-2.9041	8.61e-05	-3.35443	1.82e-05	-3.62216	1.55e-05	-3.32417	0.00014803
SLC3A1	4.45943	4.4e-09	6.89401	8.56e-05	6.9787	4.62e-05	6.19898	0.000766646	9.19838	1.2e-07
SLC40A1	8.56605	3.75e-49	10.2771	9.06e-06	10.5677	2.85e-06	10.5434	4.02e-06	10.3358	2.54e-05
SLC43A1	3.38584	3.97e-174	1.87212	0.000379786	2.6152	1.64e-07	2.53518	1.63e-06	2.5972	3.25e-05
SLC46A1	1.0283	3.63e-46	-2.81112	2.38e-08	-2.7974	1.45e-07	-2.52121	4.09e-06	-2.28906	0.000589256
SLC48A1	3.2198	4.16e-129	3.26832	6.66e-13	4.65081	1.44e-25	5.21201	3.73e-28	4.7461	4.47e-18
SLC5A3	-4.17778	0	-2.95339	1.17e-17	-4.64953	2.56e-43	-4.60841	4.89e-36	-3.50147	2.03e-10
SLC7A11	3.11548	3.16e-188	3.47968	6.68e-18	3.27162	4.51e-15	2.68789	4.33e-08	3.75521	2.98e-11
SLCO4A1	-1.68487	0	-4.30168	2.68e-30	-4.26561	4.69e-27	-3.64008	4.08e-20	-3.73194	1.32e-10
SLITRK5	-10.446	2.74e-269	-1.90119	1.09e-05	-4.20156	1.47e-16	-4.13864	6.65e-16	-2.88398	6.77e-06
SMAD6	-1.76062	3.9e-28	-2.32856	0.00110917	-3.28467	8.34e-07	-3.04661	1.42e-05	-2.90696	0.000222599
SMARCA1	-12.8491	0	-1.53717	4.09e-05	-1.75281	9.93e-08	-2.04944	9.74e-08	-1.95482	0.000658611
SMOX	2.61912	2.07e-42	2.65857	4.87e-05	3.18198	1.47e-07	3.56748	4.54e-10	2.80991	0.0002558
SNAPC3	-1.73488	9.36e-143	-1.3575	0.000772254	-2.36858	1.12e-09	-2.75254	5.03e-10	-2.06938	0.000362144
SNCG	1.34188	1.55e-46	2.08481	7.37e-08	3.96074	3.07e-33	4.84561	3.91e-38	3.04776	5.43e-08
SNTB2	-1.50473	3.07e-125	-1.16649	0.0030004	-2.55092	1.16e-11	-2.387	2.61e-08	-1.53533	0.00987869
SNX10	4.2414	4.83e-146	2.8129	2.32e-06	3.16519	2.4e-08	3.4139	3.85e-08	4.01628	3.37e-10
SNX27	-3.05441	0	-1.51761	2.53e-05	-2.84764	4.82e-17	-2.91202	6.89e-14	-1.96044	0.000362135
SNX29	-1.61262	4.18e-40	-1.85472	0.000237913	-2.6866	3.04e-07	-2.77161	8.73e-07	-2.14354	0.00153595
SP140L	3.17698	7.3e-37	3.24475	3.98e-07	3.04872	3.97e-06	3.12027	7.04e-06	2.96057	0.000264527
SPHK2	-1.55963	2.89e-70	-3.24534	8.44e-09	-2.52053	1.74e-08	-2.20308	3.33e-06	-2.90117	1.35e-06
SRCIN1	-3.40228	5.68e-204	-2.45252	6.38e-09	-2.38706	1.78e-08	-2.21619	1.17e-05	-2.70629	1.08e-05
SSBP2	-11.2439	0	-3.09657	1.25e-18	-3.03787	1.18e-14	-3.81302	1.42e-20	-3.61075	2.92e-11
ST8SIA6	-9.48684	0	-4.43945	1.15e-25	-6.23767	3.54e-37	-6.14551	1.74e-28	-4.29394	1.7e-12
STC2	-9.11721	1.45e-285	1.62309	0.000493376	2.39877	1.89e-10	1.57818	0.000756002	2.01618	0.000236452
STK24	-1.09829	4.14e-262	-1.67288	1.69e-06	-2.00635	5.44e-09	-2.47037	1.57e-10	-1.7718	0.00170405
STRA6	-5.97183	0	-2.86746	2.6e-14	-1.54207	0.000190818	-1.34461	0.00270956	-2.45652	1.79e-05
STXBP1	-1.89286	0	-1.75452	1.14e-06	-2.52577	3.18e-13	-2.31418	1.09e-08	-1.8385	0.00150219
SULF2	7.98014	2.16e-148	7.3335	8.98e-10	6.84287	1.72e-08	7.56345	4.02e-10	6.92407	1.76e-07
SUN3	-4.06763	1.38e-32	-4.85202	8.35e-07	-5.10553	9.26e-07	-6.09659	1e-06	-4.73426	1.51e-05
SV2A	-9.602	0	-2.18835	2.37e-10	-2.75748	1.04e-16	-2.49332	3.49e-09	-2.35247	2.31e-05
SVIL	-4.0307	0	-1.8194	2.04e-07	-3.22157	1.01e-20	-3.42542	1.99e-18	-2.33167	4.95e-05
SYNE1	-3.07286	9.9e-281	-2.27343	1.99e-08	-3.57229	3.58e-16	-3.2465	1.68e-09	-2.41564	3.67e-05
SYPL2	-11.6055	0	-2.9777	7.94e-13	-3.34095	2.1e-17	-3.00546	1.86e-11	-2.49516	1.94e-05
TBX1	-5.74479	1.44e-255	-2.36873	4.36e-08	-1.85525	1.29e-05	-1.69345	0.000325244	-2.32935	0.000118049
TC2N	3.13386	4.62e-29	3.40951	1.14e-06	2.54764	0.00278	2.65571	0.00282	2.65228	0.00628
TET1	-2.97199	1.82e-119	-1.32364	0.00431213	-2.92002	1.51e-09	-4.13319	8.57e-14	-3.18844	5.16e-06
TFCP2L1	6.71425	5.06e-38	7.06782	4.71e-05	6.34356	0.000367306	7.08566	4.52e-05	7.27351	6.3e-05
TFPI	4.5043	1.29e-149	2.67244	0.000133731	3.60753	1.17e-13	3.74436	1.21e-08	3.09194	4.83e-06
TGFB3	-4.77789	0	-1.78593	1.04e-05	-1.80834	0.000182693	-2.13513	4.39e-06	-2.84874	3.51e-06
THBS1	6.6837	0	4.08172	4.5e-14	3.11832	3.34e-07	3.17536	1.02e-06	4.32653	1.79e-08
TMEM104	-1.87719	1.89e-110	-2.66637	2.25e-10	-2.91247	7.11e-11	-2.65501	1.31e-08	-2.78543	3.32e-06
TMEM140	5.58496	0.000643	10.1788	1.2e-05	7.38712	0.00484046	8.25917	0.00100928	10.3439	2.04e-05
TMEM170B	-8.64386	3.42e-151	-3.82085	1.11e-10	-4.06747	4.22e-13	-3.51423	8.53e-09	-4.52668	1.14e-10
TMEM182	2.41348	2.94e-22	2.57207	0.00741728	2.50519	0.00990752	3.09279	0.00065893	2.73857	0.00949307
TMEM38A	-1.74809	2.86e-47	-2.32407	4.61e-06	-3.21668	7.29e-10	-2.78684	1.83e-06	-2.1061	0.00161965
TMSB10	3.53551	0	1.86296	6.5e-08	3.56512	3.69e-30	3.62956	1.14e-17	2.20827	6.19e-05
TMSB4X	1.4364	0	3.89751	8.23e-29	5.20135	1.28e-66	5.3225	1.93e-40	4.35348	1.54e-16
TMX4	2.21759	1.3e-80	1.71581	0.000354508	1.94177	1.27e-05	1.88442	0.000208637	2.21397	0.000321215
TNS3	8.26679	0	6.64106	1.54e-21	4.4177	5.38e-07	4.75268	7.01e-08	6.12423	7.37e-13
TOB1	-1.82844	4.06e-303	-1.99095	3.32e-08	-1.97825	3.49e-08	-1.93238	1.84e-06	-1.88209	0.000822251
TPK1	4.30117	2.77e-35	3.61636	6.39e-05	3.89706	1.08e-05	4.28897	2.07e-07	4.88204	6.49e-09
TRAPPC3L	-12.5411	0	-1.8697	1.51e-06	-1.59578	1.43e-05	-1.78992	2.33e-05	-2.59453	3.32e-06
TRIB1	4.63443	0	1.85844	0.000557991	2.37501	3.17e-06	1.87834	0.00115024	2.08744	0.00217132
TRIB2	6.02237	4.29e-21	8.64729	1.24e-07	9.05343	1.78e-08	10.0231	3.46e-10	10.433	2.8e-10
TRIB3	1.53088	3.32e-118	1.87569	2.37e-07	3.52003	1.22e-25	3.37191	2.09e-14	3.26446	4.58e-10
TRIM22	2.36257	0.000163	5.22415	1.21e-08	4.12689	0.000101794	4.25711	7.28e-05	4.10643	0.000508995
TRIM38	4.16506	8.88e-129	2.8783	0.000774498	2.4977	0.00604675	3.20827	8.85e-05	3.5087	3.55e-05
TRPM3	-6.96578	6.14e-48	-6.54165	1.7e-08	-8.24917	2.45e-06	-9.72345	9.34e-08	-6.7657	8.19e-07
TRPS1	-7.27845	0	-1.30289	0.000574281	-3.41212	3.22e-21	-3.42134	1.5e-16	-2.29291	5.11e-05
TSPAN13	3.08118	4.89e-136	2.50013	9.24e-08	2.59713	2.25e-08	2.53235	5.96e-06	2.41143	0.000155717
TSPAN9	2.39703	8.5e-53	2.4767	5.25e-07	2.74962	3.44e-09	2.93827	8.14e-09	2.01569	0.00432787
TSPYL1	-3.27571	0	-2.07564	6.69e-10	-1.57465	5.15e-05	-1.73171	1.95e-05	-2.69669	2.63e-07
TTLL3	-3.02206	1.43e-88	-2.18296	1.34e-05	-3.52284	3.34e-11	-3.38938	8.98e-08	-2.02845	0.00526004
TYRP1	-12.2342	0	-5.31955	4.97e-27	-5.08652	7.53e-36	-5.18045	5.98e-30	-3.81704	8.15e-11
UBE4B	-2.19973	0	-1.72131	5.78e-06	-2.84065	3.48e-16	-2.84809	2.72e-11	-1.85545	0.0010421
UCHL1	-12.7427	1.1e-246	1.30267	0.000669432	3.75451	6.73e-29	3.48637	1.85e-20	2.69292	3.55e-05
UCP2	1.42914	6.92e-19	3.12735	2.99e-14	2.92093	1.72e-12	3.03798	4.03e-11	3.42481	1.99e-09
UGT3A2	-11.5953	8.59e-280	-1.98856	4.02e-06	-2.35603	1.06e-07	-2.23839	1.02e-05	-2.44242	6.3e-05
ULK2	-3.04439	1.52e-46	-2.22556	0.000356	-2.81122	9.25e-06	-3.88853	7.66e-07	-4.00601	6.54e-07
UNC13C	-10.4009	0	-1.66585	3.63e-05	-2.78167	1.7e-13	-2.66371	1.13e-09	-2.40427	2.29e-05
UNC5B	2	1.4e-16	2.25315	0.00119	3.51168	9.42e-08	3.51045	1.35e-05	4.04334	2.31e-10
UNC5C	-5.9542	4.85e-27	-3.88344	0.0011881	-7.41659	0.000110178	-8.88695	8.92e-06	-7.47854	0.0002558
USP18	-1.64915	4.81e-70	-3.51444	5.42e-15	-3.33066	1.65e-13	-2.97363	1.6e-09	-3.01449	8.59e-07
UTRN	-1.42908	1.11e-133	-1.36881	0.00305962	-3.62013	1.11e-19	-4.07522	1.09e-19	-1.90803	0.00740983
VDR	4.08246	4.23e-118	3.38277	2.71e-08	2.30069	0.000951	2.35999	0.00199	2.88727	0.00021
VEPH1	-1.31933	1.6e-06	3.28041	1.28e-09	3.48298	1.43e-14	3.06555	3.97e-09	3.21518	1.61e-07
VGF	1.72935	1.94e-36	1.94025	0.000229416	1.86063	0.000410014	3.08159	6.55e-10	2.16208	0.0035131
VPS50	1.60096	2.04e-27	1.75831	0.000478164	1.65162	0.000962946	1.52111	0.00656806	1.86173	0.00945727
WBP2	-1.56648	2.62e-235	-2.57771	5.52e-13	-1.81301	1.65e-07	-1.55392	0.000494443	-1.97143	0.000433532
WDFY2	-1.0871	1.21e-30	-1.56336	0.0010908	-2.82147	1.66e-08	-2.74702	4.37e-07	-1.88432	0.00515665
WDR27	-1.44802	9.65e-56	-2.6003	3.96e-08	-3.4957	4.68e-12	-3.49936	5.03e-10	-2.83956	9.83e-06
WWOX	-1.01698	6.84e-40	-2.98636	7.37e-08	-2.39475	1.49e-05	-2.62858	1.23e-05	-3.05996	3.55e-05
YBX2	6.75437	1.53e-153	5.90867	2.23e-12	6.62466	3.21e-16	6.42918	2.38e-14	5.72616	2.31e-09
ZBTB12	-2.18491	1.12e-65	-2.4747	1.13e-06	-2.38904	2.26e-06	-2.13992	0.000153969	-1.92309	0.00397694
ZBTB37	-1.21632	2.27e-30	-2.93155	7.7e-09	-5.38252	1.77e-16	-5.36057	3.28e-13	-3.57168	1.58e-05
ZBTB5	-3.50878	0	-1.59922	0.000538385	-2.71744	1.51e-13	-2.19699	1.09e-07	-2.09086	0.000143071
ZDHHC15	-8.3837	3.5e-43	-6.8384	1.48e-07	-7.09137	6.99e-07	-6.21653	6.21e-07	-8.16042	1.65e-05
ZDHHC21	-1.28951	1.7e-32	2.77748	1.05e-12	2.26948	2.66e-09	2.01085	1.32e-06	2.50675	5.94e-06
ZFHX2	-1.97598	5.1e-49	-2.50098	3.66e-06	-3.93472	1.95e-11	-3.05607	3.68e-07	-2.60473	0.000337405
ZFHX4	-9.71939	0	-6.97142	2.89e-44	-13.0794	6.17e-17	-13.1249	1.26e-16	-7.92537	0.00125
ZFP62	-3.45554	0	-1.82739	1.4e-06	-2.31385	2.01e-10	-2.28231	4.4e-08	-2.18691	0.000237571
ZIC2	8.14466	1.61e-32	9.08577	0.000178784	9.59373	3.32e-05	9.55769	4.57e-05	9.47196	0.000122117
ZIC5	7.03342	8.49e-24	8.50556	0.000731362	8.40319	0.000540668	8.32234	0.000772872	8.82381	0.000508
ZNF114	-10.1956	0	-3.50179	1.27e-16	-3.44199	5.44e-16	-3.89421	1.19e-15	-3.55813	1.65e-09
ZNF12	-1.37769	5.44e-31	2.20029	1.93e-05	2.15148	1.25e-09	1.34296	0.00211344	1.79022	0.00267322
ZNF121	-1.07343	5.86e-68	-2.27114	1.78e-08	-4.81446	1.52e-30	-4.91927	5.77e-24	-3.07425	0.000391724
ZNF140	1.53771	1.25e-36	1.92565	2.11e-05	2.57955	3.23e-11	2.27489	6.59e-07	2.56707	2.47e-05
ZNF239	9.86419	2.53e-83	10.7264	2.9e-06	10.5968	3.03e-06	10.4634	4.88e-06	10.9104	4.43e-06
ZNF320	6.5411	1.6e-167	6.89994	6.4e-21	5.92409	2.43e-14	5.87014	6.54e-13	6.78759	4.68e-16
ZNF423	-3.16993	0.000885	3.70508	7.1e-07	2.84451	0.001367	3.2134	0.000285797	3.34502	0.000282587
ZNF430	8.40088	2.47e-46	10.0531	1.59e-05	9.06887	0.000117097	8.72281	0.000338319	9.55615	0.000101851
ZNF431	8.04985	1.32e-83	8.66879	0.000416893	7.51886	0.00385891	7.1996	0.00829948	7.82213	0.00433706
ZNF485	8.22882	1.86e-27	6.19108	0.000840334	5.99214	0.00117947	5.86638	0.00203254	6.45306	0.000728191
ZNF532	6.06609	3.57e-74	7.87189	9.4e-21	6.76988	4.03e-14	6.61766	2.36e-12	7.28746	2.15e-14
ZNF607	3.52629	7.2e-31	3.75063	8.72e-07	3.34176	5.12e-05	3.02222	0.00117284	3.76462	1.81e-05
ZNF646	-1.56501	1.6e-76	-1.78768	2.04e-05	-2.91553	6.18e-12	-2.63554	8.89e-08	-2.10008	0.00138469
ZNF680	10.7781	6.12e-198	11.2583	7.38e-07	10.4918	3.46e-06	10.2979	7.99e-06	10.6562	8.28e-06
ZNF714	7.35755	4.91e-57	8.24677	5.94e-07	6.8928	5.9e-05	6.80764	0.00010876	7.59112	2.8e-05
ZNF717	5.89077	1.33e-29	4.12454	0.000540871	4.26811	0.00023068	4.48544	9.41e-05	4.14768	0.00143402
ZNF718	4.52356	9.46e-05	10.0851	1.54e-05	9.61314	3.07e-05	10.0686	1.3e-05	10.5344	1.09e-05
ZNF738	9.47776	9.79e-85	9.51286	5.79e-05	8.98673	0.000137668	9.07473	0.000142412	8.60531	0.000857219
ZNF775	-2.97837	4.54e-96	-3.50455	1.49e-11	-2.19897	8.37e-06	-1.82961	0.000515752	-2.78828	2.15e-05
ZNF778	-2.36984	2.81e-111	-1.53467	0.000501208	-3.43193	8.41e-14	-3.91786	1.86e-13	-2.10348	0.00682955
ZSCAN18	-8.19476	6.94e-30	1.93219	0.000135541	3.29965	4.36e-16	3.63964	3.04e-16	2.74313	9.58e-06
ZYX	1.57549	5.03e-132	1.97403	1.2e-05	2.39904	2.71e-12	2.8812	1.46e-13	2.54297	9.76e-06
